# Supplementary material for: Neighborhood Disadvantage, Race and Ethnicity, and Postpartum Depression
Source: PubMed Central journal article supplement (PMC10644210; doi:10.1001/jamanetworkopen.2023.42398), 2023-11-13
Supplement: jamanetwopen-e2342398-s001.pdf [file jamanetwopen-e2342398-s001.pdf]

## Supplementary Online Content

Onyewuenyi TL, Peterman K, Zaritsky E, et al. Neighborhood disadvantage, race and ethnicity, and postpartum depression. *JAMA Netw Open.* 2023;6(11):e2342398.  
doi:10.1001/jamanetworkopen.2023.42398

**eAppendix.** List of International Statistical Classification of Diseases and Related Health Problems (ICD) depression diagnosis codes included in the analysis.

This supplementary material has been provided by the authors to give readers additional information about their work.

**eAppendix. List of International Statistical Classification of Diseases and Related Health Problems (ICD) Depression Diagnosis Codes Included in the Analysis.**

|                                          |                                                                                        |
|------------------------------------------|----------------------------------------------------------------------------------------|
| <b>ICD-9 Depression diagnosis codes</b>  | 296.20 - 296.25<br>296.30 - 296.35<br>298.0<br>300.4<br>309.0<br>309.1<br>311<br>648.4 |
| <b>ICD-10 Depression diagnosis codes</b> | F33.9<br>F34.1<br>F43.21<br>F43.23<br>F53.0<br>O90.6<br>O99.34                         |
