# Supplementary material for: Neighborhood Disadvantage, Race and Ethnicity, and Postpartum Depression
Source: PubMed Central journal article supplement (PMC10644210; doi:10.1001/jamanetworkopen.2023.42398), 2023-11-13
Supplement: jamanetwopen-e2342398-s002.pdf [file jamanetwopen-e2342398-s002.pdf]

## Data Sharing Statement

Onyewuenyi. Neighborhood Disadvantage, Race and Ethnicity, and Postpartum Depression. *JAMA Netw Open*. Published November 13, 2023. doi:10.1001/jamanetworkopen.2023.42398

### Data

**Data available:** No
